# Supplementary material
Source: MDPI journal article supplement (https://www.mdpi.com/2073-4441/15/7/1419)
Supplement: s1 [file s1]

## Supplementary data

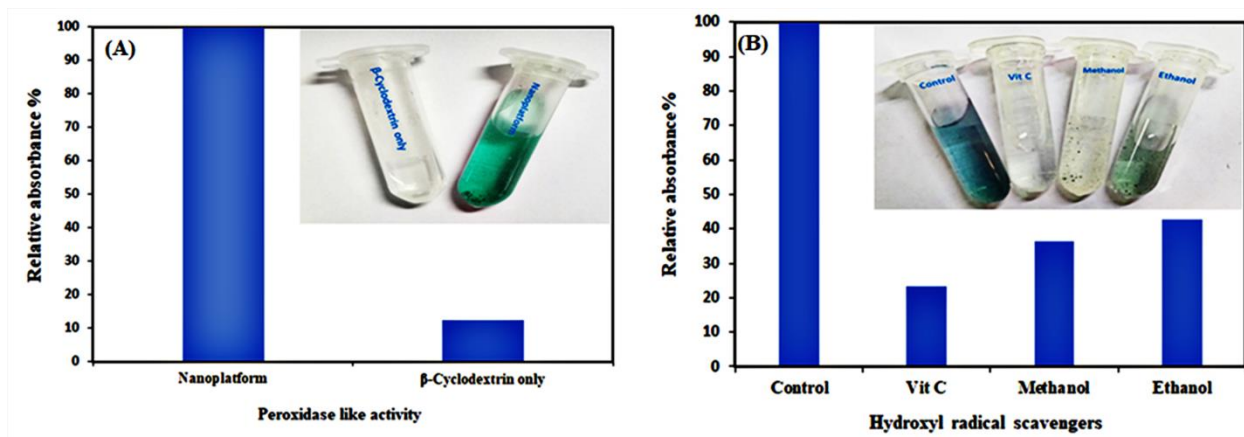

**Figure S1.** Study of the peroxidase-like activity of only  $\beta$ -cyclodextrin and in the combination of nanoplateform (A) and the effect of radical scavengers on the produced  $\cdot\text{OH}$  (B).

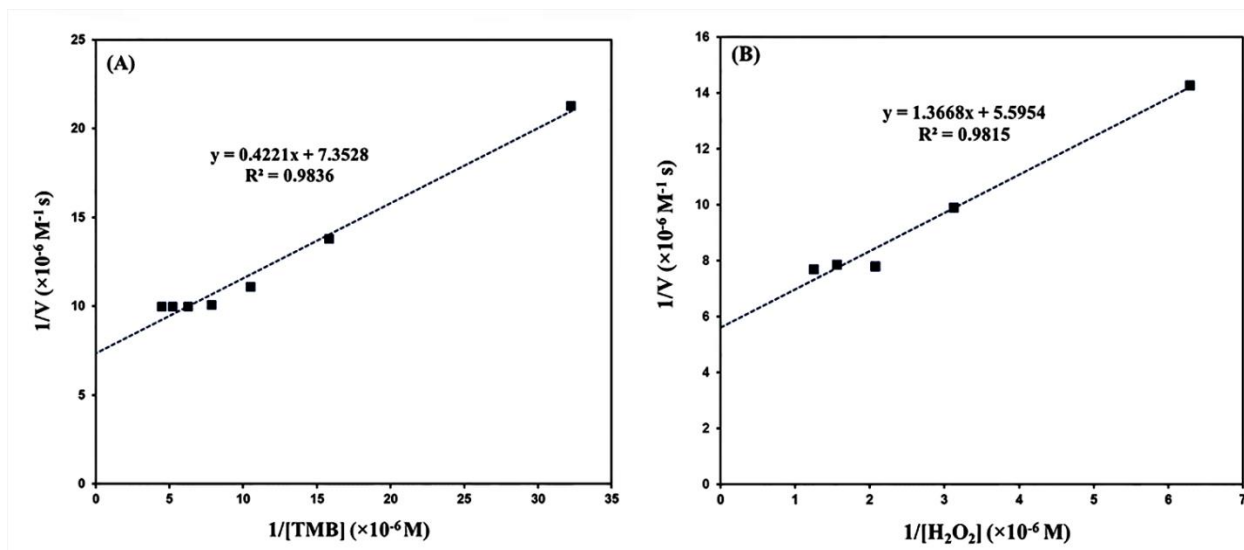

**Figure S2.** Lineweaver–Burk curve for the peroxidase-mimicking activity of the synthesized nanoplateform in the presence of TMB (A) and  $\text{H}_2\text{O}_2$  (B) as substrates.

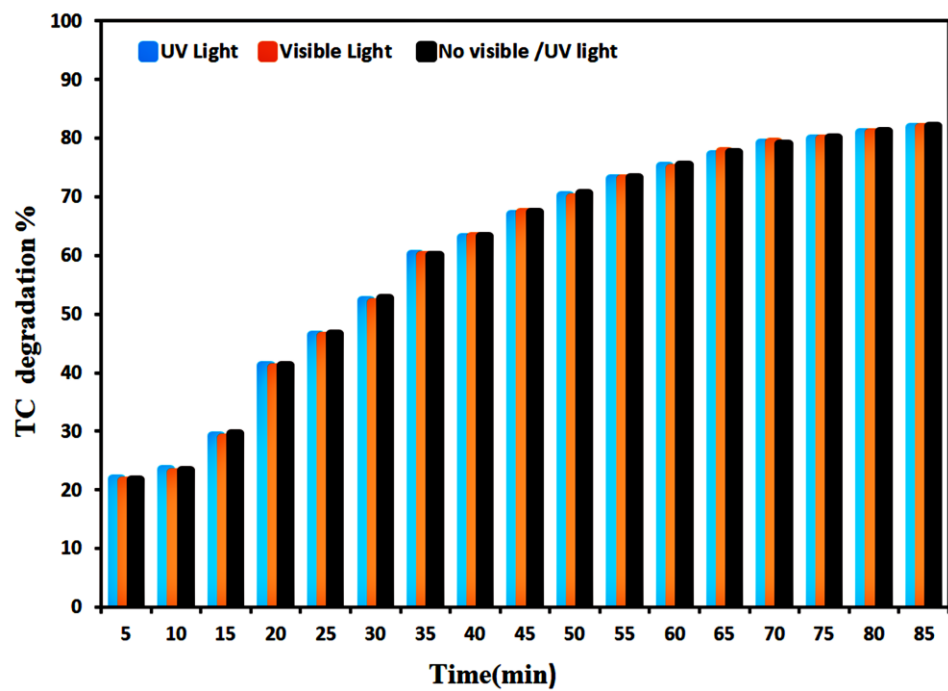

**Figure S3.** Effect of visible and UV light on the percentage of TC degradation.

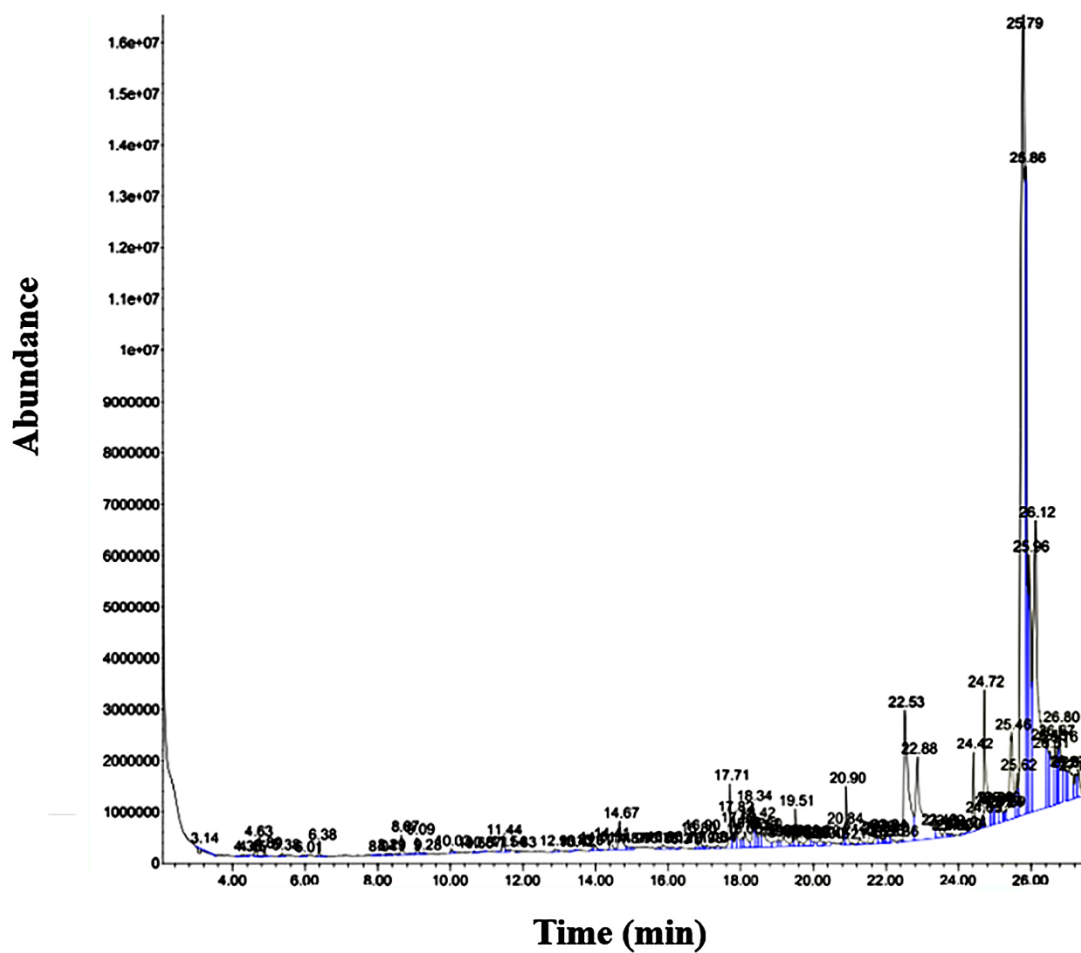

Figure S4. GC-MS profile of degradation products of TC.

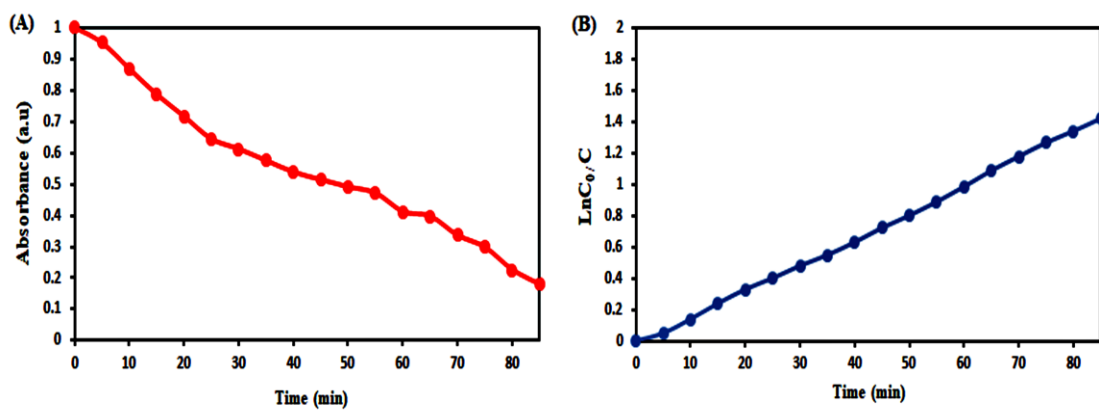

Figure S5. Degradation kinetic constant of TC.
